# Supplementary material
Source: publisher site journal article supplement (https://www.dovepress.com/article/306315)
Supplement: Supplementary file 1 [file get_supplementary_file.php]

**Table Supplemental 1** Characteristics of control participants across the Tertiles of Energy-adjusted Dietary Inflammatory Index (E-DII)

| **Characteristic** | | **Tertile 1**  **(n=31)** | | **Tertile 2**  **(n=32)** | | **Tertile 3**  **(n=33)** |
| --- | --- | --- | --- | --- | --- | --- |
| **Continuous variable** |  | | mean ± SD | |  | |
|  | |  | |  | |  |
| Age (year) | | 42.42±11.99 | | 43.09±15 | | 41.94±13.71 |
| Weight (kg) | | 79.33±19.7 | | 74.06±13.46 | | 72.3±15.51 |
| Height (cm) | | 166.77±10.59 | | 165.03±8.33 | | 162.52±9.45 |
| Body mass index (BMI) (kg/ | | 28.06±6.86 | | 26.91±5.85 | | 27.36±5.76 |
| Body Surface Area () | | 1.91±0.26 | | 1.84±0.19 | | 1.8±0.22 |
| Total Body Water (L) | | 38.03±8.12 | | 35.31±5.28 | | 34.99±5.93 |
| Lean Mass (kg) | | 51.34±9.93 | | 48.45±6.79 | | 47.05±7.85 |
| Fat Mass (kg) | | 27.99±11.55 | | 25.61±8.98 | | 25.25±10.03 |
| Body fat percentage (%) | | 32.34±9.32 | | 32.97±10.39 | | 32.7±10.61 |
|  | |  | |  | |  |
| **Categorical variable** |  | | n (%) | |  | |
|  |  | |  | |  | |
| Male | | 15(48.39%) | | 10(31.25%) | | 12(36.36%) |
| Overweight | | 11(35.48%) | | 11(35.48%) | | 13(39.39%) |
| Obese | | 8(25.81%) | | 9(28.13%) | | 8(24.24%) |
| Education | |  | |  | |  |
| Primary | | 3(9.68%) | | 5(15.63%) | | 4(12.12%) |
| Secondary | | 23(74.19%) | | 24(75%) | | 26(78.79%) |
| Tertiary | | 5(16.13%) | | 3(9.38%) | | 3(9.09%) |
| Job | |  | |  | |  |
| Unemployed | | 7(22.58%) | | 10(31.25%) | | 10(30.30%) |
| Social status | |  | |  | |  |
| Single | | 7(22.58%) | | 6(18.75%) | | 4(12.12%) |
| Physical activity | |  | |  | |  |
| Inactive | | 7(22.58%) | | 17(53.13%) | | 16(48.48%) |
| Smoking | |  | |  | |  |
| Current Smoker | | 2(3.23%) | | 5(15.63%) | | 3(9.09%) |
| Medical Comorbidity | |  | |  | |  |
| Type 2 diabetes mellitus | | 1(3.23%) | | 2(6.25%) | | 4(12.12%) |
| Hypertension | | 5(16.13%) | | 5(15.63%) | | 1(3.03%) |

**Table Supplemental 2** Characteristics of depression case participants across the tertiles of Energy-adjusted Dietary Inflammatory Index (E-DII)

| **Characteristic** | | **Tertile 1**  **(n=32)** | | **Tertile 2**  **(n=13)** | | **Tertile 3**  **(n=51)** |
| --- | --- | --- | --- | --- | --- | --- |
| **Continuous variable** |  | | mean ± SD | |  | |
|  |  | |  | |  | |
| Age (year) | | 43.91±12.91 | | 41.23±15.67 | | 45.02±11.63 |
| Weight (kg) | | 76.56±18.76 | | 71.75±15.54 | | 77.4±19.31 |
| Height (cm) | | 164.09±9.29 | | 160.92±10.94 | | 162.25±9.39 |
| Body mass index (BMI) (Kg/ | | 28.45±6.78 | | 28.03±7.11 | | 29.58±7.78 |
| Body Surface Area () | | 1.86±0.25 | | 1.78±0.21 | | 1.85±0.24 |
| Total Body Water (L) | | 36.45±6.51 | | 34.81±5.42 | | 35.98±6.55 |
| Lean Mass (kg) | | 49.29±8.23 | | 46.53±7.35 | | 48.35±8.12 |
| Fat Mass (kg) | | 27.27±12.79 | | 25.22±11.87 | | 29.05±13.53 |
| Body fat percentage (%) | | 33.77±11.93 | | 32.73±12.86 | | 37.07±11.86 |
|  | |  | |  | |  |
| **Categorical variable** |  | | n (%) | |  | |
|  |  | |  | |  | |
| Male | | 15(46.88%) | | 6(46.15%) | | 16(31.37%) |
| Overweight | | 12(37.50%) | | 6(46.15%) | | 12(23.53%) |
| Obese | | 9(28.13%) | | 4(30.77%) | | 23(45.10%) |
| Education | |  | |  | |  |
| Primary | | 10(31.25%) | | 3(23.08%) | | 14(28%) |
| Secondary | | 21(65.63%) | | 9(69.23%) | | 35(70%) |
| Tertiary | | 1(3.13%) | | 1(7.69%) | | 1(2%) |
| Job | |  | |  | |  |
| Unemployed | | 22(68.75%) | | 10(79.92%) | | 37(72.55%) |
| Social status | |  | |  | |  |
| Single | | 9(28.13%) | | 5(38.46%) | | 17(33.33%) |
| Physical activity | |  | |  | |  |
| Inactive | | 23(71.88%) | | 7(53.85%) | | 35(68.63%) |
| Smoking | |  | |  | |  |
| Current smoker | | 10(32.26%) | | 4(33.33%) | | 21(41.18%) |
| Medical comorbidity | |  | |  | |  |
| Type 2 diabetes mellitus | | 12(37.50%) | | 4(30.77%) | | 10(19.61%) |
| Hypertension | | 13(40.63%) | | 3(23.08%) | | 11(21.57%) |

**Table Supplemental 3** Distribution of nutrients and dietary factors across tertiles of Dietary Inflammatory Index (DII) for control subjects

| **Nutrient or dietary factor/day (mean ± SD)** | **Tertile 1 (n=31)** | **Tertile 2 (n=32)** | **Tertile 3 (n=33)** |
| --- | --- | --- | --- |
| Energy (Kcal) | 2463.66± 517.83 | 2463.66± 517.83 | 2030.93± 563.6 |
| Protein (g) | 90.06± 24.78 | 90.06± 24.78 | 82.52± 28.09 |
| Carbohydrates (g) | 284.77± 62.34 | 284.77± 62.34 | 244.52± 72.23 |
| Fibers (g) | 22.89± 8.07 | 22.89± 8.07 | 14.49± 3.31 |
| Fats (g) | 62.34± 18.68 | 62.34± 18.68 | 53.49± 19.48 |
| SFA (g) | 27.99± 9.58 | 27.99± 9.58 | 23.97± 8.68 |
| MUFA (g) | 20.93± 6.38 | 20.93± 6.38 | 16.93± 6.69 |
| PUFA (g) | 16.86± 6.15 | 16.86± 6.15 | 11.72± 5.99 |
| Trans fats (g) | 0.45± 0.48 | 0.45± 0.48 | 0.4± 0.31 |
| Cholesterol (mg) | 237.22± 96.77 | 237.22± 96.77 | 218.51± 80.83 |
| Omega-3 (g) | 0.83± 0.36 | 0.83± 0.36 | 0.68± 0.3 |
| Omega-6 (g) | 9.41± 4.87 | 9.41± 4.87 | 8.92± 5.4 |
| Thiamin (mg) | 1.53± 0.48 | 1.53± 0.48 | 1.33± 0.55 |
| Riboflavin (mg) | 1.52± 0.55 | 1.52± 0.55 | 1.31± 0.48 |
| Niacin (mg) | 20.08± 5.93 | 20.08± 5.93 | 17.53± 7.37 |
| Vitamin B6 (mg) | 2.33± 0.54 | 2.33± 0.54 | 1.85± 0.61 |
| VitaminB12 (mcg) | 3.44± 1.88 | 3.44± 1.88 | 2.68± 2.08 |
| Vitamin C (mg) | 123.83± 57.57 | 123.83± 57.57 | 96.89± 71.84 |
| Vitamin D (IU) | 97.72± 69.11 | 97.72± 69.11 | 71.44± 58.41 |
| Vitamin E (mg) | 2.69± 1.6 | 2.69± 1.6 | 2.39± 1.4 |
| Vitamin A (IU) | 871.22± 297.96 | 871.22± 297.96 | 760.1± 271.33 |
| β-carotene (µg) | 1997.32± 870.38 | 1997.32± 870.38 | 1683.76± 920.94 |
| Folic Acid (µg) | 453.75± 211.06 | 453.75± 211.06 | 387.04± 247.32 |
| Iron (mg) | 33.04± 10.36 | 33.04± 10.36 | 30.44± 13.86 |
| Magnesium (mg) | 448.55± 191.34 | 448.55± 191.34 | 253.44± 73.09 |
| Selenium (µg) | 64.9± 22.46 | 64.9± 22.46 | 48.43± 16.9 |
| Zinc (mg) | 7.98± 2.88 | 7.98± 2.88 | 7.08± 2.72 |
| Alcohol (g) | 0±0 | 0±0 | 0±0 |
| Caffeine (mg) | 267.48± 316.39 | 267.48± 316.39 | 231.5± 234.27 |
| Calcium (mg) | 690.12± 346.38 | 690.12± 346.38 | 588.4± 273.96 |
| Sodium (mg) | 1795.69± 616.3 | 1795.69± 616.3 | 1515.79± 629.21 |
| Phosphorus (mg) | 871.75± 302.69 | 871.75± 302.69 | 787.46± 277.55 |
| Potassium (g) | 3415.65± 914.95 | 3415.65± 914.95 | 2606.18± 700.36 |
| DII Normal | -0.08± 0.54 | -0.08± 0.54 | 1.6± 0.4 |
| DII Energy-adjusted (E-DII) | 0.30± 0.9 | 0.30± 0.9 | 1.33± 0.91 |

**Table Supplemental 4** Distribution of nutrients and dietary factors across Tertiles of Dietary Inflammatory Index (DII) for depression cases

| **Nutrient or dietary factor/day**  **(mean ± SD)** | **Tertile 1**  **(n=32)** | **Tertile 2**  **(n=13)** | **Tertile 3**  **(n=51)** |
| --- | --- | --- | --- |
| Energy (Kcal) | 3252± 818.75 | 2863.16± 610.05 | 2218.7± 738.64 |
| Protein (g) | 121.78± 38.6 | 122.59± 36.84 | 98.09± 35.37 |
| Carbohydrates (g) | 327.71± 97.25 | 299.24± 95.89 | 236.47± 95.83 |
| Fibers (g) | 36.09± 14.35 | 18.63± 6.57 | 11.85± 6.13 |
| Fat (g) | 83.67± 26.3 | 75.4± 26.45 | 63.81± 25.07 |
| SFA (g) | 39.33± 12.01 | 37.78± 14.88 | 31.04± 12.2 |
| MUFA (g) | 27.22± 9.66 | 25.19± 10.11 | 22.08± 10.19 |
| PUFA (g) | 21.39± 7.05 | 16.01± 4.46 | 14.54± 8.2 |
| Trans fats (g) | 0.44± 0.28 | 0.34± 0.15 | 0.32± 0.18 |
| Cholesterol (mg) | 398.27± 163.53 | 397.52± 144.27 | 326.88± 133.16 |
| Omega-3 (g) | 1.02± 0.69 | 1.05± 0.35 | 0.64± 0.3 |
| Omega-6 (g) | 12.6± 8.57 | 11.24± 4.44 | 8.93± 4.39 |
| Thiamin (mg) | 1.71± 0.48 | 1.53± 0.57 | 1.21± 0.53 |
| Riboflavin (mg) | 1.83± 0.61 | 1.61± 0.47 | 1.42± 0.5 |
| Niacin (mg) | 24.21± 6.53 | 21.72± 6.77 | 17.64± 7.7 |
| Vitamin B6 (mg) | 2.8± 0.75 | 2.16± 0.3 | 1.6± 0.62 |
| Vitamin B12 (µg) | 3.71± 2.25 | 4.88± 2.97 | 2.24± 1.75 |
| Vitamin C (mg) | 119.94± 67.93 | 96.75± 47.69 | 71.08± 47.12 |
| Vitamin D (IU) | 90.86± 59.61 | 116.3± 72.99 | 65.51± 61.85 |
| Vitamin E (mg) | 3.73± 1.97 | 2.55± 0.85 | 2.72± 1.44 |
| Folic Acid (µg) | 1198.4± 393.72 | 973.84± 312.85 | 870.85± 377.67 |
| Vitamin A (IU) | 2214.31± 818.41 | 1531.33± 723.54 | 1825.09± 1024.82 |
| β-carotene (µg) | 500.71± 214.85 | 476.31± 211.4 | 375.8± 174.64 |
| Iron (mg) | 46.43± 20.38 | 39.16± 13.41 | 34.83± 15.77 |
| Magnesium (mg) | 469.94± 225.07 | 315.49± 84.78 | 226.19± 100.35 |
| Selenium (µg) | 72.42± 28.58 | 64.86± 15.06 | 59.31± 23.72 |
| Zinc (mg) | 11.07± 3.92 | 10.45± 4.89 | 8.31± 3.93 |
| Alcohol (g) | 0±0 | 0±0 | 0±0 |
| Caffeine (mg) | 212.79± 198.89 | 166.29± 210.54 | 133.47± 160.15 |
| Calcium (mg) | 797.35± 340.54 | 718.84± 231.8 | 568.74± 284.05 |
| Sodium (mg) | 2374.53± 818.5 | 2280.73± 673.16 | 1949.92± 909.55 |
| Phosphorus (mg) | 1046.83± 297.73 | 995.42± 304.61 | 808.39± 275.95 |
| Potassium (g) | 4116.58± 1074.67 | 3229.76± 553.54 | 2590.64± 930.69 |
| DII Normal | -0.47± 0.58 | 0.8± 0.18 | 2.05± 0.62 |
| DII Energy-adjusted (E-DII) | 0.83± 0.84 | 1.91± 0.84 | 2.24± 0.93 |

**Table Supplemental 5** Distribution of nutrients and dietary factors across tertiles of Energy-adjusted Dietary Inflammatory Index for depression cases by depression severity according to BDI-2

| **Nutrient or dietary factor/day**  **(mean ± SD)** | **Mild**  **(n=13)** | **Moderate**  **(n=40)** | **Severe**  **(n=43)** |
| --- | --- | --- | --- |
| Energy (Kcal) | 2576.57± 648.3 | 2683.43± 867.08 | 2642± 972.46 |
| Protein (g) | 103.48± 27.26 | 110.59± 36.71 | 109.87± 42.74 |
| Carbohydrates (g) | 258.43± 90.04 | 287.19± 100.49 | 269.53± 112.66 |
| Fibers (g) | 22.82± 12.34 | 20.61± 15.93 | 20.47± 14.34 |
| Fat (g) | 71.52± 18.43 | 70.68± 24.08 | 73.37± 31.75 |
| SFA (g) | 34.13± 8.63 | 33.91± 11.84 | 35.64± 15.15 |
| MUFA (g) | 23.05± 7.12 | 23.19± 8.78 | 25.52± 12.05 |
| PUFA (g) | 17.61± 7.91 | 17.57± 8.49 | 16.33± 7.69 |
| Trans fats (g) | 0.41± 0.19 | 0.34± 0.18 | 0.37± 0.27 |
| Cholesterol (mg) | 374.4± 111.61 | 359.43± 151.47 | 356.71± 157.28 |
| Omega-3 (g) | 0.8± 0.46 | 0.74± 0.36 | 0.9± 0.62 |
| Omega-6 (g) | 11.53± 5.03 | 10.1± 4.97 | 10.49± 7.65 |
| Thiamin (mg) | 1.33± 0.46 | 1.44± 0.56 | 1.43± 0.6 |
| Riboflavin (mg) | 1.51± 0.6 | 1.54± 0.48 | 1.65± 0.63 |
| Niacin (mg) | 19.84± 6.64 | 20.52± 7.43 | 20.41± 8.49 |
| Vitamin B6 (mg) | 2.08± 0.88 | 2.02± 0.76 | 2.12± 0.9 |
| Vitamin B12 (µg) | 2.82± 2.54 | 2.86± 2.24 | 3.37± 2.32 |
| Vitamin C (mg) | 86.95± 66.12 | 94.4± 58.38 | 88.71± 58.26 |
| Vitamin D (IU) | 75.72± 76.18 | 70.94± 64.59 | 91.6± 60.82 |
| Vitamin E (mg) | 3.38± 1.63 | 2.85± 1.23 | 3.09± 1.97 |
| Folic Acid (µg) | 972.69± 495.69 | 986.58± 337.05 | 1007.3± 431.85 |
| Vitamin A (IU) | 2448.19± 607.52 | 1824.95± 736.92 | 1837.68± 1142.95 |
| β-carotene (µg) | 370.19± 163.8 | 402.26± 191.64 | 476.22± 213.05 |
| Iron (mg) | 36.63± 14.47 | 40.16± 16.25 | 39.27± 20.23 |
| Magnesium (mg) | 310.5± 105.09 | 309.14± 172.69 | 331.94± 219.36 |
| Selenium (µg) | 68.19± 35.99 | 60.38± 18.75 | 67.07± 26.35 |
| Zinc (mg) | 8.84± 3.51 | 8.8± 3.44 | 10.39± 4.95 |
| Alcohol (g) | 0±0 | 0±0 | 0±0 |
| Caffeine (mg) | 149.58± 171.47 | 151.02± 178.06 | 181.22± 192.28 |
| Calcium (mg) | 671.57± 272 | 656.16± 303.22 | 671.84± 340.37 |
| Sodium (mg) | 2176.57± 852.55 | 2180.21± 867.73 | 2083.18± 888.04 |
| Phosphorus (mg) | 868.27± 251.74 | 902.74± 280.27 | 936.5± 345.39 |
| Potassium (,g) | 3157.67± 891.5 | 3155.74± 1080.61 | 3222.33± 1322.16 |
| DII Normal | 0.92± 1.46 | 1.27± 1.15 | 0.87± 1.34 |
| DII Energy-adjusted (E-DII) | 1.60± 1.19 | 1.92± 1.0 | 1.58± 1.15 |
